# Supplementary material for: CdSe/ZnS quantum dots as a booster in the active layer of distributed ternary organic photovoltaics
Source: publisher site journal article supplement (doi:10.3762/bjnano.15.14), 2024-02-02
Supplement: Additional file 1 [file 2190-4286-15-14-S1.pdf]

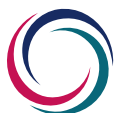

## Supporting Information

for

### **CdSe/ZnS quantum dots as a booster in the active layer of distributed ternary organic photovoltaics**

Gabriela Lewińska, Piotr Jeleń, Zofia Kucia, Maciej Sitarz, Łukasz Walczak, Bartłomiej Szafraniak, Jerzy Sanetra and Konstanty W. Marszalek

*Beilstein J. Nanotechnol.* **2024**, *15*, 144–156. [doi:10.3762/bjnano.15.14](https://doi.org/10.3762/bjnano.15.14)

### **Additional material from AFM studies**

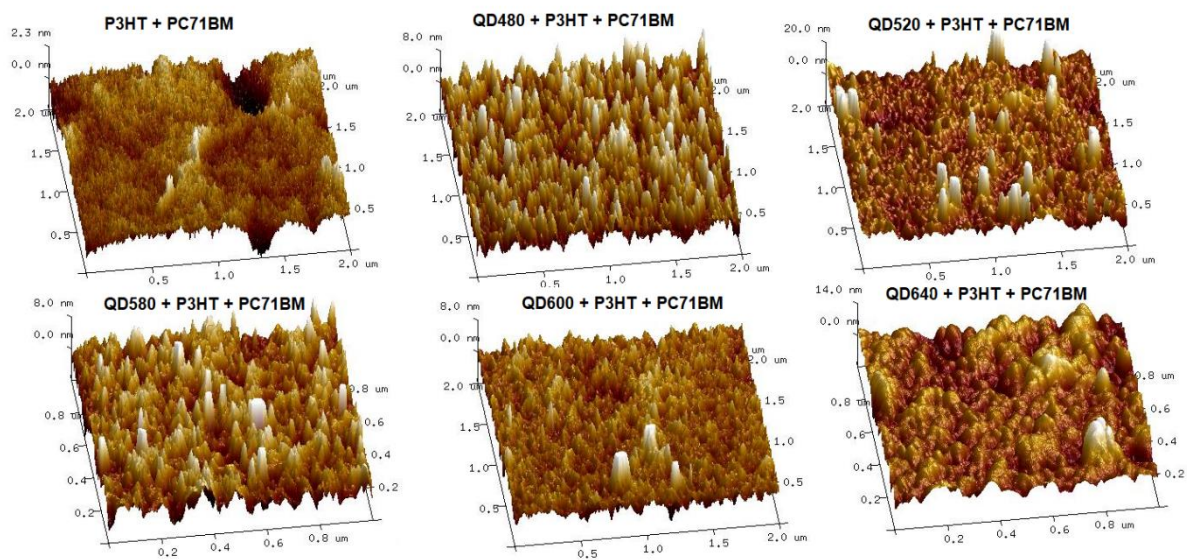

**Figure S1:** 3D AFM images of investigated quantum dots, P3HT and PCBM mixtures.
